# Supplementary material for: pH-Responsive magnetic nanocarriers for chelator-free bimodal (MRI/SPECT-CT) image-guided chemo-hyperthermia therapy in human breast carcinoma
Source: Royal Society of Chemistry journal article supplement (doi:10.1039/d4tb00980k), 2024-01-01
Supplement: d4tb00980k1.pdf [file d4tb00980k1.pdf]

## Electronic Supplementary Information(†ESI)

### **pH-responsive Magnetic Nanocarriers for Chelator-free Bimodal (MRI/SPECT-CT) Image Guided Chemo-hyperthermia Therapy in Human Breast Carcinoma**

Bijaideep Dutta<sup>a,b</sup>, Neena G. Shetake<sup>b,c</sup>, Sourav Patra<sup>b,d</sup>, Rubel Chakravarty<sup>b,d</sup>, K. V. Vimalnath<sup>d</sup>, Avik Chakraborty<sup>b,e</sup>, Sudipta Chakraborty<sup>b,d</sup>, B. N. Pandey<sup>b,c</sup>, P. A. Hassan<sup>a,b,\*</sup>, K. C. Barick<sup>a,b,\*</sup>

<sup>a</sup>Chemistry Division, Bhabha Atomic Research Centre, Mumbai 400085, India

<sup>b</sup>Homi Bhabha National Institute, Anushaktinagar, Mumbai 400094, India

<sup>c</sup>Radiation Biology and Health Sciences Division, Bhabha Atomic Research Centre, Mumbai 400085, India

<sup>d</sup>Radiopharmaceutical Division, Bhabha Atomic Research Centre, Mumbai 400085, India

<sup>e</sup>Radiation Medicine Centre, Bhabha Atomic Research Centre, Mumbai 400012, India

\*Corresponding authors: hassan@barc.gov.in (P. A. Hassan), kcbarick@barc.gov.in (K. C. Barick)

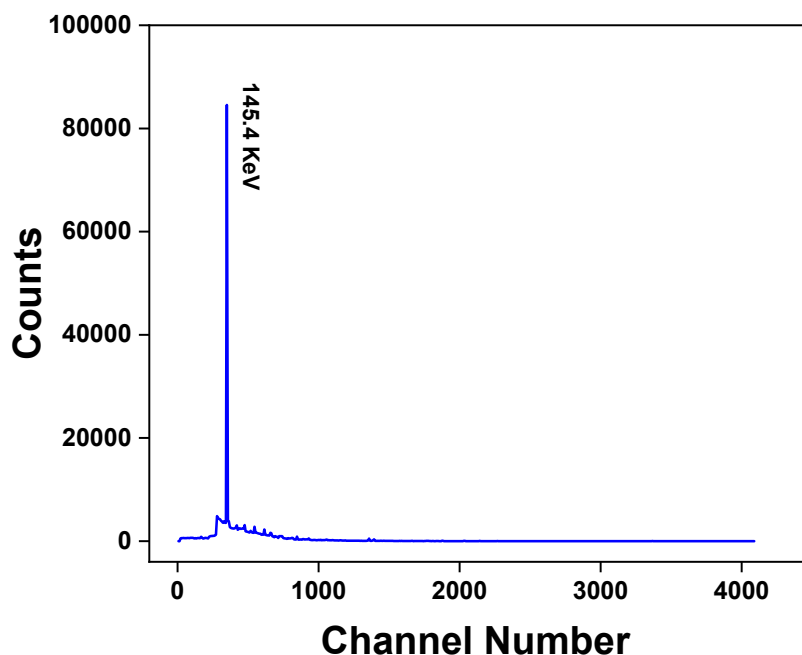

**Fig. S1.**  $\gamma$ - spectrum of  $^{141}\text{Ce}$  recorded in HPGe detector.

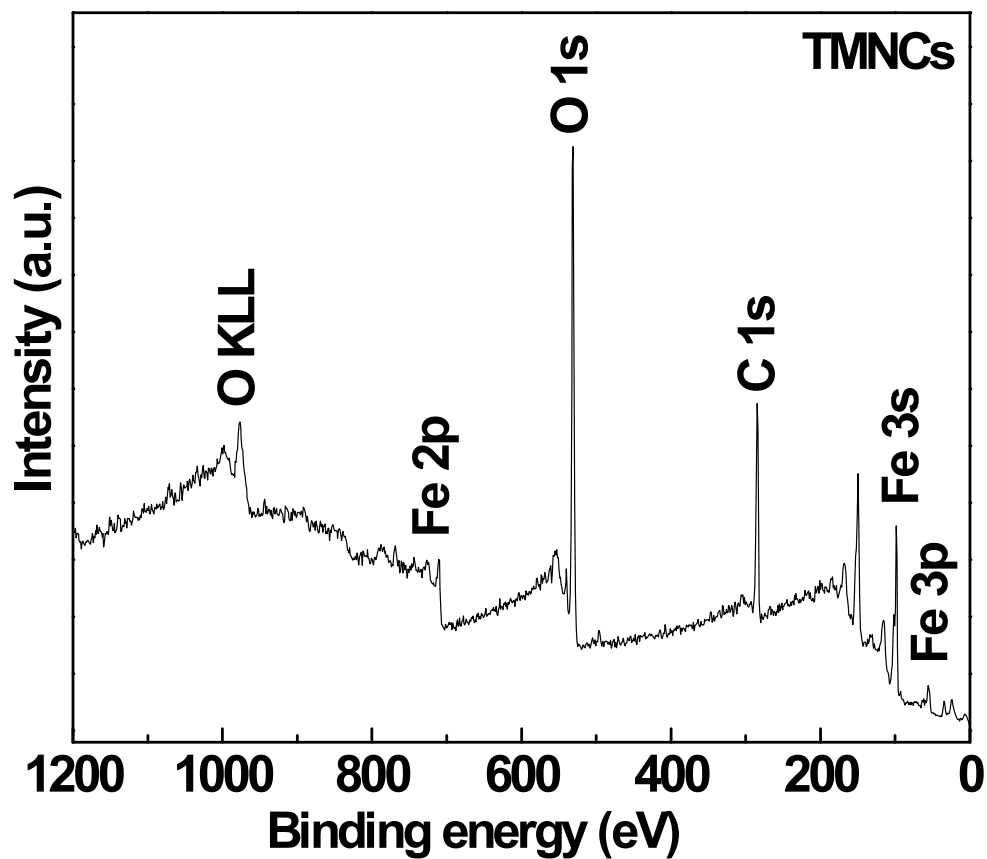

**Fig. S2.** Fig. S1. XPS survey scan of TMNCs. The peaks corresponding to Fe (Fe 2p, Fe 3p, Fe 3s), O (O 1s) and C (C1s) are observed on TMNCs. In addition, auger peak corresponding to O KLL transition is also found [1].

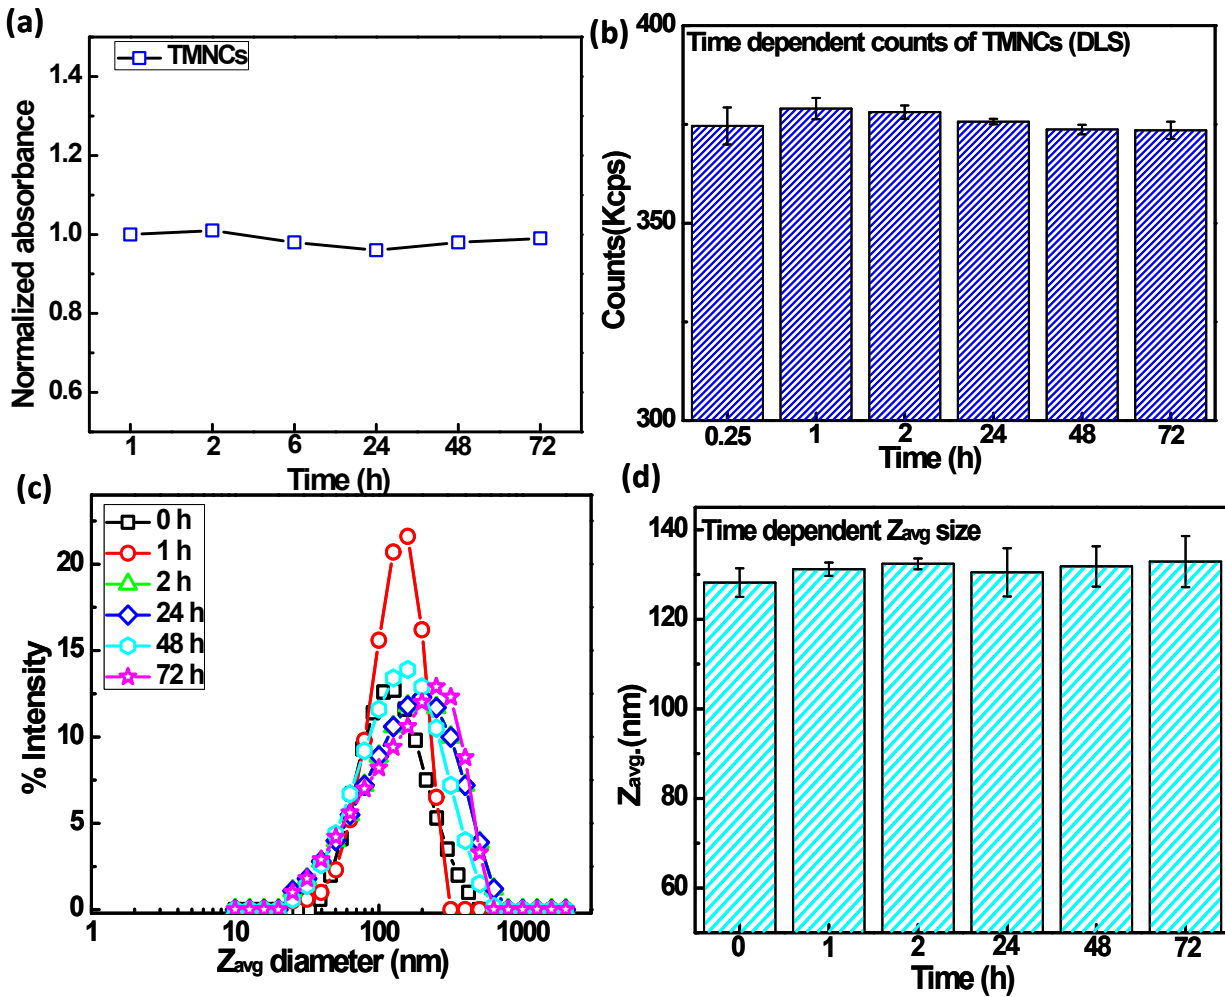

**Fig. S3.** Colloidal stability studies of TMNCs by (a) time dependent absorbance measurement using UV-vis spectrophotometer, time dependent DLS measurement by monitoring the (b) counts, (c) and (d) average hydrodynamic diameter.

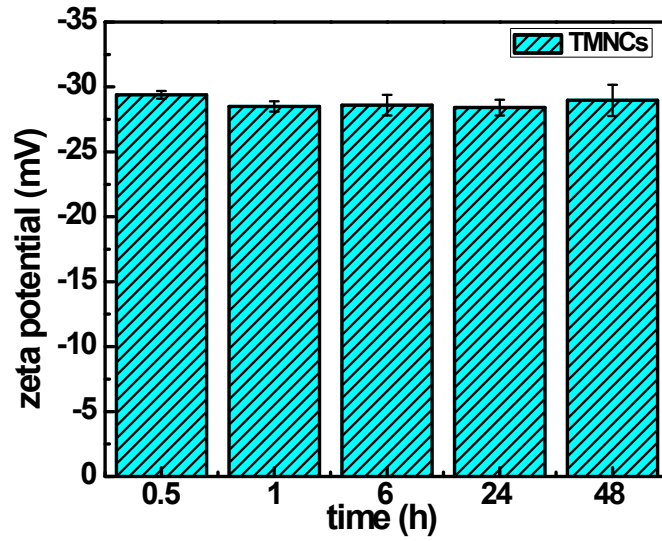

Fig. S4. Time dependent surface charge measurement for TMNCs and BSA interaction.

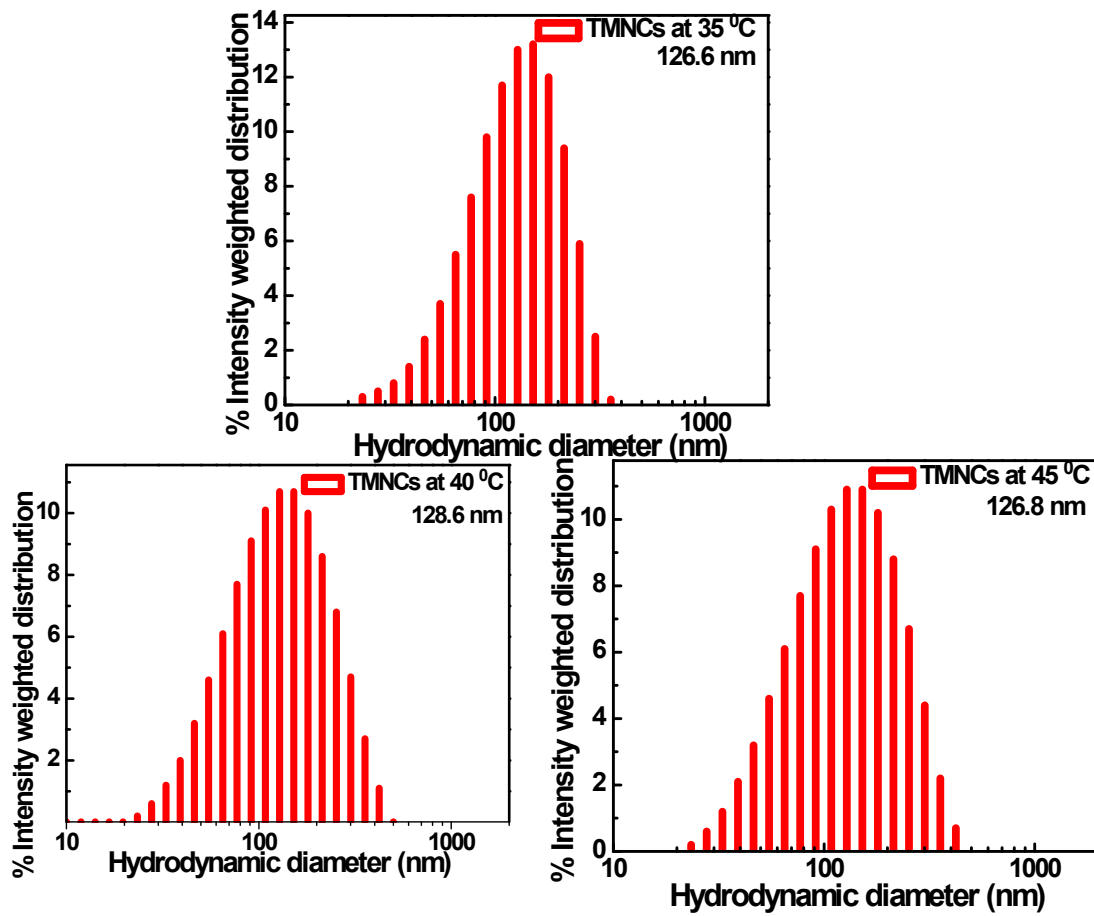

Fig. S5. Temperature dependent DLS size distribution.

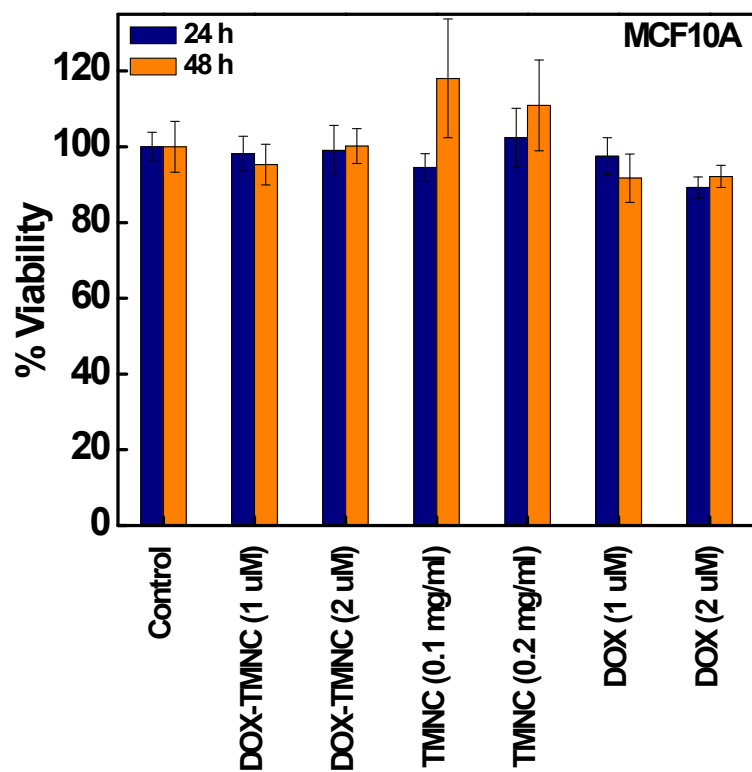

**Fig. S6.** Cell viability of MCF10A cell lines at 24 h and 48 h upon treatment with Pure DOX and DOX-TMNC.

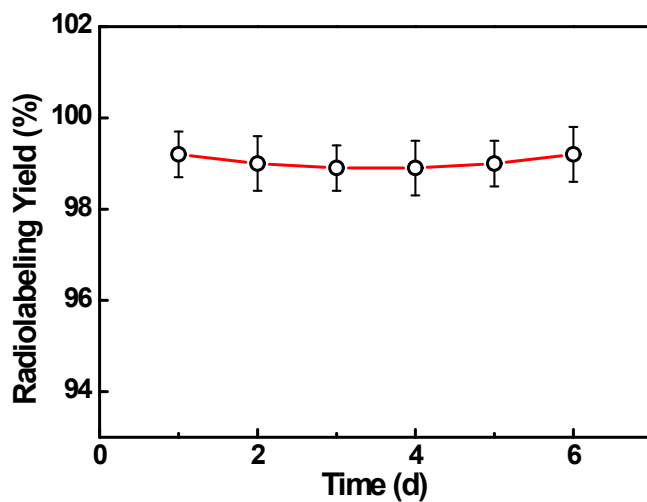

**Fig. S7.** Determination of the radiochemical stability of  $^{141}\text{Ce}$ -TMNCs at different time intervals.

### **Sorption characteristics:**

The linear fitting formula for the aforementioned isotherms are given bellow

#### ***(A) Langmuir isotherm***

The linear form of the Langmuir isotherm is given as

$$\frac{C_e}{q_e} = \frac{C_e}{Q_0} + \frac{1}{Q_0 b}$$

Where  $Q_0$  is monolayer adsorption capacity ( $\text{mg g}^{-1}$ ) and  $b$  ( $\text{L/mg}$ ) is the constant and  $C_e$  is the equilibrium concentration of  $\text{Ce}^{+3}$  ions ( $\text{gL}^{-1}$ ).

#### ***(B) Freundlich Isotherm***

The Freundlich isotherm is rely on multilayer adsorption of the adsorbates on the surface of adsorbents and the linear form of the isotherm could be written as

$$\log(q_e) = \log K_F + \frac{1}{n} \ln(C_e)$$

Where  $K_F$  ( $\text{mg/g}$ ) and  $n$  (dimensionless) are Freundlich constant.

#### ***(C) Langmuir-Freundlich (L-F) isotherm***

The combination of Langmuir and Freundlich isotherm is known as Langmuir-Freundlich isotherm which is an empirical model. The linear form of the model is given as

$$q_e = \frac{Q_{max} K_{LF} C_e^{\frac{1}{n_{LF}}}}{1 + K_{LF} C_e^{\frac{1}{n_{LF}}}}$$

Where  $K_{LF}$  ( $\text{mg} \cdot \text{L}^{-1}$ ) $^{-1/n_{LF}}$  is L-F constant,  $Q_{\text{max}}$  ( $\text{mg} \cdot \text{g}^{-1}$ ) is maximum adsorption capacity and  $n_{LF}$  ( $0 < n_{LF} \leq 1$ ) is an exponent.

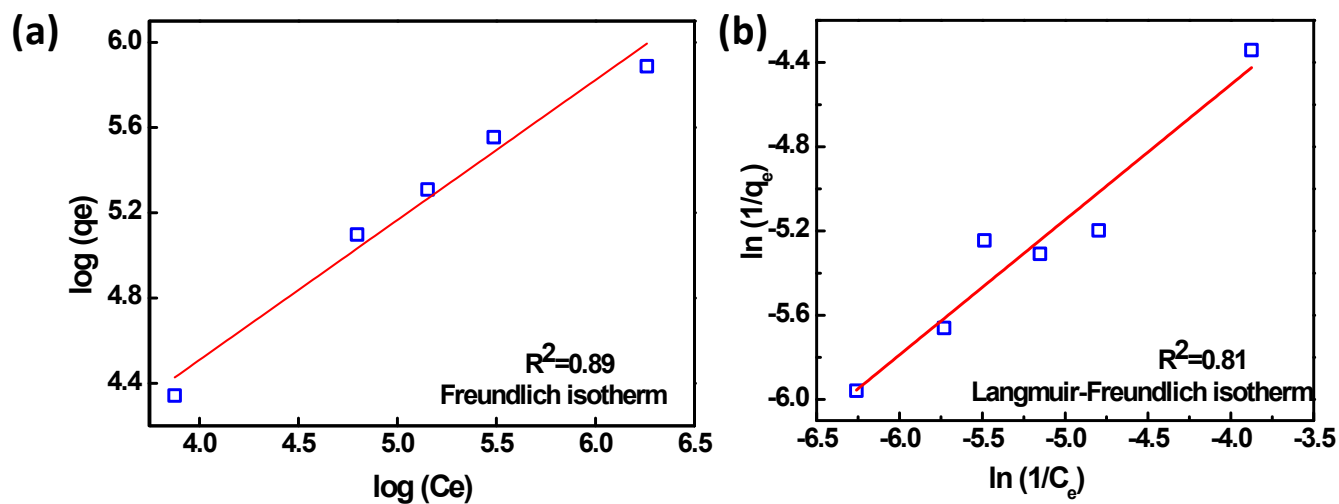

**Fig. S8.** Fitting of the data to the (a) Freundlich isotherm model (b) Langmuir-Freundlich isotherm model for adsorption of  $^{141}\text{Ce}$  on TMNC.

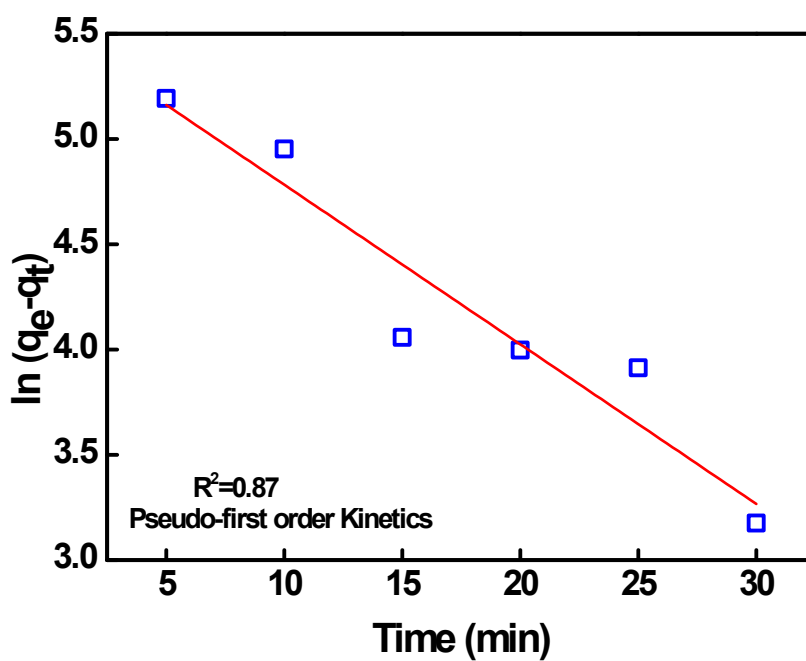

**Fig. S9.** Fitting of the data to the kinetics model for adsorption of  $^{141}\text{Ce}$  on TMNC (A) pseudo-first order kinetics model.

**Kinetic models:**

**(A) Pseudo-first-order reaction**

The linear model for pseudo-first order kinetics is given bellow

$$\log (q_e - q_t) = \log q_e - \frac{k_1 t}{2.303}$$

Where  $k_1$  ( $\text{min}^{-1}$ ) is the rate constant for the pseudo first order kinetics and  $q_t$  ( $\text{mg g}^{-1}$ ) is the sorption capacity of TMNC at time  $t$  (min).

**(B) Pseudo-second-order reaction**

The linear model for pseudo-second order kinetics is given bellow

$$\frac{t}{q_t} = \frac{1}{k_2 q_e^2} + \frac{t}{q_e}$$

Where  $k_2$  ( $\text{g mg}^{-1} \text{min}^{-1}$ ) is the rate constant for the pseudo first order kinetics and the calculated rate constant was found to be  $2.45 \times 10^{-3} \text{ g mg}^{-1} \text{min}^{-1}$ .

**References:**

1. G. Carraro, D. Barreca, D. Bekermann, T. Montini, A. Gasparotto, V. Gombac, C. Maccato, P. Fornasiero; J. Nanosci. Nanotechnol. 2013, **13**,4962-4968.
