# Supplementary material for: pH-Responsive magnetic nanocarriers for chelator-free bimodal (MRI/SPECT-CT) image-guided chemo-hyperthermia therapy in human breast carcinoma
Source: Royal Society of Chemistry journal article supplement (doi:10.1039/d4tb00980k), 2024-01-01
Supplement: d4tb00980k2.pdf [file d4tb00980k2.pdf]

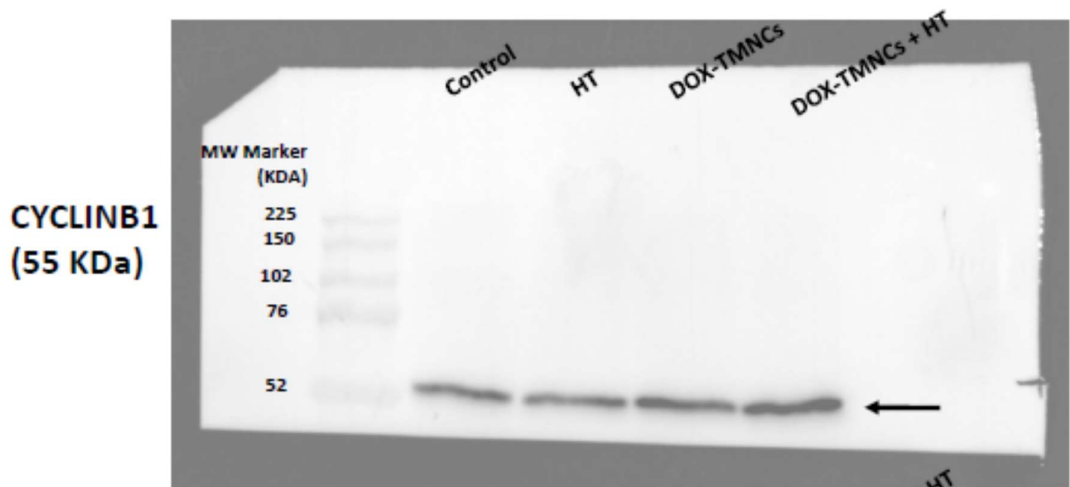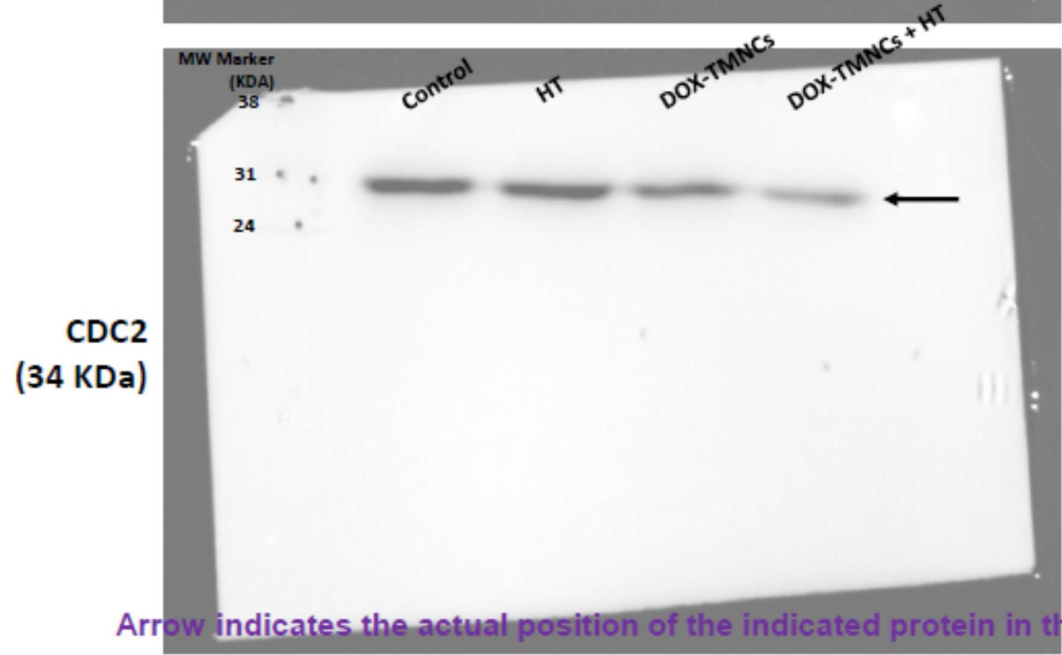

Arrow indicates the actual position of the indicated protein in the blot

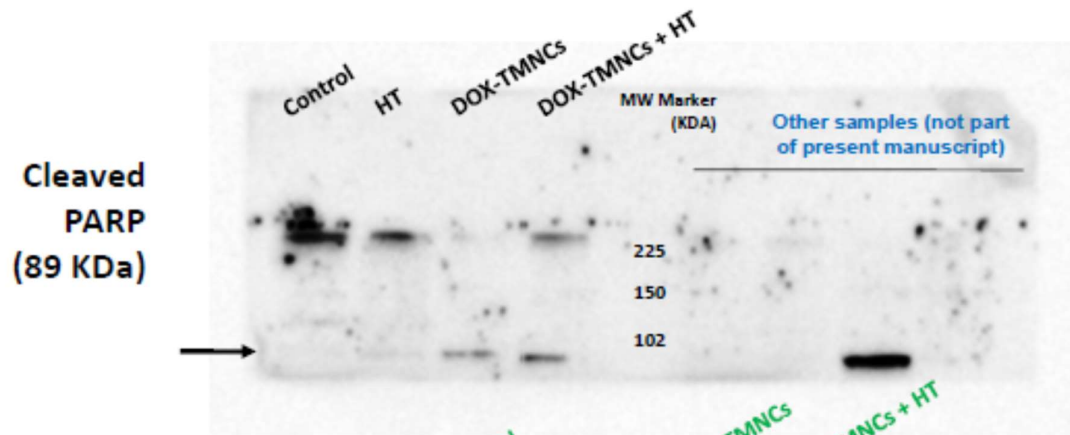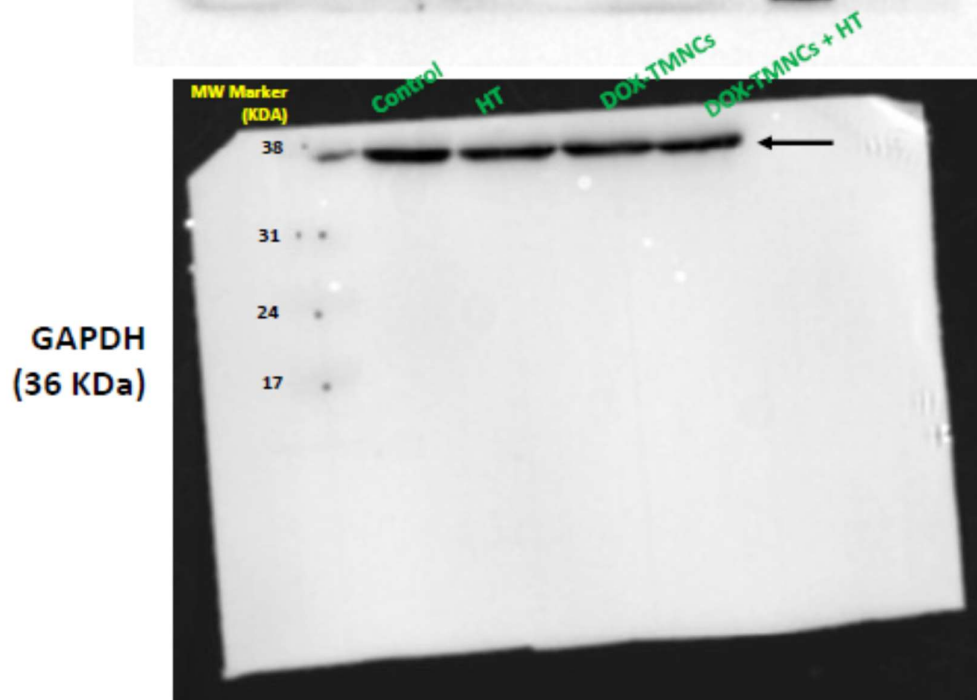

Arrow indicates the actual position of the indicated protein in the blot
